# Supplementary material for: Transcriptomic and Proteomic Analyses Reveal the Potential Mode of Action of Chondrocyte Sheets in Hyaline Cartilage Regeneration
Source: PubMed Central journal article supplement (PMC6981399; doi:10.3390/ijms21010149), 2019-12-24
Supplement: ijms-21-00149-s001.pdf [file ijms-21-00149-s001.pdf]

### Supplementary Table 1

The details of PD cells used for PD-sheets fabrication

| ID       | Gender | Months | Plating | Passage | Freezing medium |
|----------|--------|--------|---------|---------|-----------------|
| Stock 1  | N.A.   | N.A.   | explant | N.A.    | SCB             |
| Stock 2  | F      | 17     | cell    | P2      | SCB             |
| Stock 3  | M      | 15     | cell    | P2      | SCB             |
| Stock 4  | F      | 15     | cell    | P6      | SCB             |
| Stock 5  | N.A.   | N.A.   | explant | N.A.    | TC protector    |
| Stock 6  | M      | 8      | cell    | P2      | SCB             |
| Stock 7  | F      | 10     | cell    | P2      | SCB             |
| Stock 8  | F      | 10     | cell    | P2      | SCB             |
| Stock 9  | F      | 23     | cell    | P2      | SCB             |
| Stock 10 | F      | 15     | cell    | P3      | SCB             |
| Stock 11 | M      | 12     | cell    | P2      | SCB             |
| Stock 12 | M      | 12     | cell    | P4      | SCB             |

Stock4 and Stock10 derived from same donor.

Stock7 and Stock8 derived from same donor of different body parts.

All other stocks derived from different donors.

N.A.; data not available, SCB; STEM-CELLBANKER,

## Supplementary Table 2

## Top20 genes of positive correlation

| Gene ID | Gene Symbol | GeneName                                                                             | Corr |
|---------|-------------|--------------------------------------------------------------------------------------|------|
| 25791   | NGEF        | neuronal guanine nucleotide exchange factor                                          | 0.81 |
| 388115  | C15orf52    | chromosome 15 open reading frame 52                                                  | 0.80 |
| 3200    | HOXA3       | homeobox A3                                                                          | 0.80 |
| 3914    | LAMB3       | laminin, beta 3                                                                      | 0.80 |
| 375719  | AQP7P1      | aquaporin 7 pseudogene 1                                                             | 0.77 |
| 27122   | DKK3        | dickkopf WNT signaling pathway inhibitor 3                                           | 0.76 |
| 864     | RUNX3       | runt-related transcription factor 3                                                  | 0.72 |
| 6662    | SOX9        | SRY (sex determining region Y)-box 9                                                 | 0.71 |
| 1605    | DAG1        | dystroglycan 1 (dystrophin-associated glycoprotein 1)                                | 0.70 |
| 91683   | SYT12       | synaptotagmin XII                                                                    | 0.70 |
| 51655   | RASD1       | RAS, dexamethasone-induced 1                                                         | 0.69 |
| 57538   | ALPK3       | alpha-kinase 3                                                                       | 0.69 |
| 3655    | ITGA6       | integrin, alpha 6                                                                    | 0.69 |
| 9510    | ADAMTS1     | ADAM metallopeptidase with thrombospondin type 1 motif, 1                            | 0.68 |
| 28996   | HIPK2       | homeodomain interacting protein kinase 2                                             | 0.67 |
| 54206   | ERRFI1      | ERBB receptor feedback inhibitor 1                                                   | 0.67 |
| 9788    | MTSS1       | metastasis suppressor 1                                                              | 0.67 |
| 6649    | SOD3        | superoxide dismutase 3, extracellular                                                | 0.66 |
| 317762  | CCDC85C     | coiled-coil domain containing 85C                                                    | 0.65 |
| 4241    | MFI2        | antigen p97 (melanoma associated) identified by monoclonal antibodies 133.2 and 96.5 | 0.64 |

Supplementary Table 3 Top20 genes of negative correlation

| Gene ID   | Gene Symbol  | GeneName                                                    | Corr  |
|-----------|--------------|-------------------------------------------------------------|-------|
| 65980     | BRD9         | bromodomain containing 9                                    | -0.81 |
| 286319    | TUSC1        | tumor suppressor candidate 1                                | -0.81 |
| 10252     | SPRY1        | sprouty homolog 1, antagonist of FGF signaling (Drosophila) | -0.80 |
| 388759    | C1orf229     | chromosome 1 open reading frame 229                         | -0.80 |
| 84264     | HAGHL        | hydroxyacylglutathione hydrolase-like                       | -0.80 |
| 400604    | TOB1-AS1     | TOB1 antisense RNA 1                                        | -0.80 |
| 27023     | FOXB1        | forkhead box B1                                             | -0.79 |
| 113091    | PTH2         | parathyroid hormone 2                                       | -0.79 |
| 218       | ALDH3A1      | aldehyde dehydrogenase 3 family, member A1                  | -0.79 |
| 55731     | FAM222B      | family with sequence similarity 222, member B               | -0.78 |
| 256933    | NPB          | neuropeptide B                                              | -0.78 |
| 85294     | KRTAP2-4     | keratin associated protein 2-4                              | -0.77 |
| 284365    | MGC45922     | uncharacterized LOC284365                                   | -0.77 |
| 102724362 | LOC102724362 | uncharacterized LOC102724362                                | -0.77 |
| 7755      | ZNF205       | zinc finger protein 205                                     | -0.77 |
| 80164     | PRR36        | proline rich 36                                             | -0.77 |
| 27068     | PPA2         | pyrophosphatase (inorganic) 2                               | -0.77 |
| 94097     | SFXN5        | sideroflexin 5                                              | -0.77 |
| 92597     | MOB1B        | MOB kinase activator 1B                                     | -0.76 |
| 101928760 | LOC101928760 | uncharacterized LOC101928760                                | -0.76 |
| 100287098 | LOC100287098 | uncharacterized LOC100287098                                | -0.76 |

Supplementary Table 4 Top20 secreted proteins of positive correlation

| Gene ID | Symbol   | Description                                  | r    |
|---------|----------|----------------------------------------------|------|
| 81035   | COLEC12  | collectin subfamily member 12                | 0.7  |
| 1520    | CTSS     | cathepsin S                                  | 0.68 |
| 11082   | ESM1     | endothelial cell specific molecule 1         | 0.64 |
| 2512    | FTL      | ferritin light chain                         | 0.61 |
| 2495    | FTH1     | ferritin heavy chain 1                       | 0.61 |
| 26585   | GREM1    | gremlin 1, DAN family BMP antagonist         | 0.59 |
| 2896    | GRN      | granulin precursor                           | 0.56 |
| 12      | SERPINA3 | serpin family A member 3                     | 0.56 |
| 54205   | CYCS     | cytochrome c, somatic                        | 0.54 |
| 3570    | IL6R     | interleukin 6 receptor                       | 0.52 |
| 22943   | DKK1     | dickkopf WNT signaling pathway inhibitor 1   | 0.52 |
| 7058    | THBS2    | thrombospondin 2                             | 0.51 |
| 5580    | PRKCD    | protein kinase C delta                       | 0.51 |
| 6590    | SLPI     | secretory leukocyte peptidase inhibitor      | 0.5  |
| 3593    | IL12B    | interleukin 12B                              | 0.48 |
| 51561   | IL23A    | interleukin 23 subunit alpha                 | 0.48 |
| 9902    | MRC2     | mannose receptor C type 2                    | 0.48 |
| 27121   | DKK4     | dickkopf WNT signaling pathway inhibitor 4   | 0.48 |
| 51506   | UFC1     | ubiquitin-fold modifier conjugating enzyme 1 | 0.47 |
| 6750    | SST      | somatostatin                                 | 0.47 |

Supplementary Table 5 Top20 secreted proteins of negative correlation

| Gene ID | Symbol    | Description                                            | r     |
|---------|-----------|--------------------------------------------------------|-------|
| 4666    | NACA      | nascent polypeptide-associated complex alpha subunit   | -0.75 |
| 6372    | CXCL6     | C-X-C motif chemokine ligand 6                         | -0.75 |
| 10924   | SMPDL3A   | sphingomyelin phosphodiesterase acid like 3A           | -0.71 |
| 27120   | DKKL1     | dickkopf like acrosomal protein 1                      | -0.7  |
| 5617    | PRL       | prolactin                                              | -0.7  |
| 7006    | TEC       | tec protein tyrosine kinase                            | -0.68 |
| 6356    | CCL11     | C-C motif chemokine ligand 11                          | -0.67 |
| 3553    | IL1B      | interleukin 1 beta                                     | -0.65 |
| 3459    | IFNGR1    | interferon gamma receptor 1                            | -0.62 |
| 6387    | CXCL12    | C-X-C motif chemokine ligand 12                        | -0.62 |
| 6885    | MAP3K7    | mitogen-activated protein kinase kinase kinase 7       | -0.61 |
| 10454   | TAB1      | TGF-beta activated kinase 1 (MAP3K7) binding protein 1 | -0.61 |
| 4982    | TNFRSF11B | TNF receptor superfamily member 11b                    | -0.6  |
| 7076    | TIMP1     | TIMP metalloproteinase inhibitor 1                     | -0.6  |
| 1933    | EEF1B2    | eukaryotic translation elongation factor 1 beta 2      | -0.59 |
| 2050    | EPHB4     | EPH receptor B4                                        | -0.58 |
| 3791    | KDR       | kinase insert domain receptor                          | -0.58 |
| 51129   | ANGPTL4   | angiopoietin like 4                                    | -0.58 |
| 8576    | STK16     | serine/threonine kinase 16                             | -0.56 |
| 8742    | TNFSF12   | TNF superfamily member 12                              | -0.55 |

**Supplementary Table 6 . ICRS histological grading system**

| <b>Item</b>                                                              | <b>Description</b>                                                                                                                                                                                                                                                                                                                       |
|--------------------------------------------------------------------------|------------------------------------------------------------------------------------------------------------------------------------------------------------------------------------------------------------------------------------------------------------------------------------------------------------------------------------------|
| Ti: Tissue morphology                                                    | <ol style="list-style-type: none"><li>1: Exclusively not cartilage</li><li>2: Mostly not cartilage</li><li>3: Mostly fibrocartilage</li><li>4: Mostly hyaline cartilage</li></ol>                                                                                                                                                        |
| Matx: Matrix staining                                                    | <ol style="list-style-type: none"><li>1: None</li><li>2: Slight</li><li>3: Moderate</li><li>4: Strong</li></ol>                                                                                                                                                                                                                          |
| Stru: Structural integrity                                               | <ol style="list-style-type: none"><li>1: Severe disintegration</li><li>2: Cysts or disruptions</li><li>3: No organization of chondrocytes</li><li>4: Beginning of columnar organization of chondrocytes</li><li>5: Normal, similar to healthy mature cartilage</li></ol>                                                                 |
| Clus: Chondrocyte clustering in implant                                  | <ol style="list-style-type: none"><li>1: 25–100% of the cells clustered</li><li>2: &lt; 25% of the cells clustered</li><li>3: No clusters</li></ol>                                                                                                                                                                                      |
| Tide: Intactness of the calcified cartilage layer, formation of tidemark | <ol style="list-style-type: none"><li>1: &lt; 25% of the calcified cartilage layer intact</li><li>2: 25–49% of the calcified cartilage layer intact</li><li>3: 50–75% of the calcified cartilage layer intact</li><li>4: 76–90% of the calcified cartilage layer intact</li><li>5: Completely intact calcified cartilage layer</li></ol> |
| Bform: Subchondral bone formation                                        | <ol style="list-style-type: none"><li>1: No formation</li><li>2: Slight</li><li>3: Strong</li></ol>                                                                                                                                                                                                                                      |
| SurfH: Histological appraisal of surface architecture                    | <ol style="list-style-type: none"><li>1: Severe fibrillation or disruption</li><li>2: Moderate fibrillation or irregularity</li><li>3: Slight fibrillation or irregularity</li></ol>                                                                                                                                                     |

4: Normal

---

FilH: Histological appraisal defect filling

1: < 25%

2: 26–50%

3: 51–75%

4: 76–90%

5: 91–110%

---

LatI: Lateral integration of implanted material

1: Not bonded

2: Bonded at one end/partially both ends

3: Bonded at both sides

---

BasI: Basal integration of implanted material

1: < 50%

2: 50–70%

3: 70–90%

4: 91–100%

---

InfH: Inflammation

1: Strong inflammation

3: Slight inflammation

5: No inflammation

---

**Maximum total**

**45 points**

---

This system evaluates repaired tissue based on 11 items: tissue morphology (Ti); matrix staining (Matx); structural integrity (Stru); cluster formation (Clus); tidemark opening (Tide); bone formation (Bform); histological appraisal of surface architecture (SurfH); histological appraisal of the degree of defect filling (FilH); lateral integration of defect - filling tissue (LatI); basal integration of defect - filling tissue (BasI); and histological signs of inflammation (InfH). The total score range is 11–45.

Supplementary Table 7 Probes used in TaqMAN gene expression assay

| Gene Symbol | Assay ID      | Reference Sequence                                                       |
|-------------|---------------|--------------------------------------------------------------------------|
| ACAN        | Hs00153936_m1 | NM_013227.3; NM_001135.3                                                 |
| ACTB        | Hs01060665_g1 | NM_001101.3                                                              |
| GDF5        | Hs00167060_m1 | NM_000557.2                                                              |
| ITGA10      | Hs01006923_g1 | NM_003637.3                                                              |
| SOX9        | Hs01001343_g1 | NM_000346.3                                                              |
| SOX5        | Hs00753050_s1 | NM_001261414.1; NM_006940.4; NM_001261415.1;<br>NM_178010.2; NM_152989.3 |
